# Supplementary material
Source: PubMed Central journal article supplement (PMC6585463)
Supplement: NIHMS1529138-supplement-Supplemental_Material.pdf [file NIHMS1529138-supplement-Supplemental_Material.pdf]

## **SUPPLEMENTAL MATERIAL**

## Supplementary Figure 1: CONSORT diagram

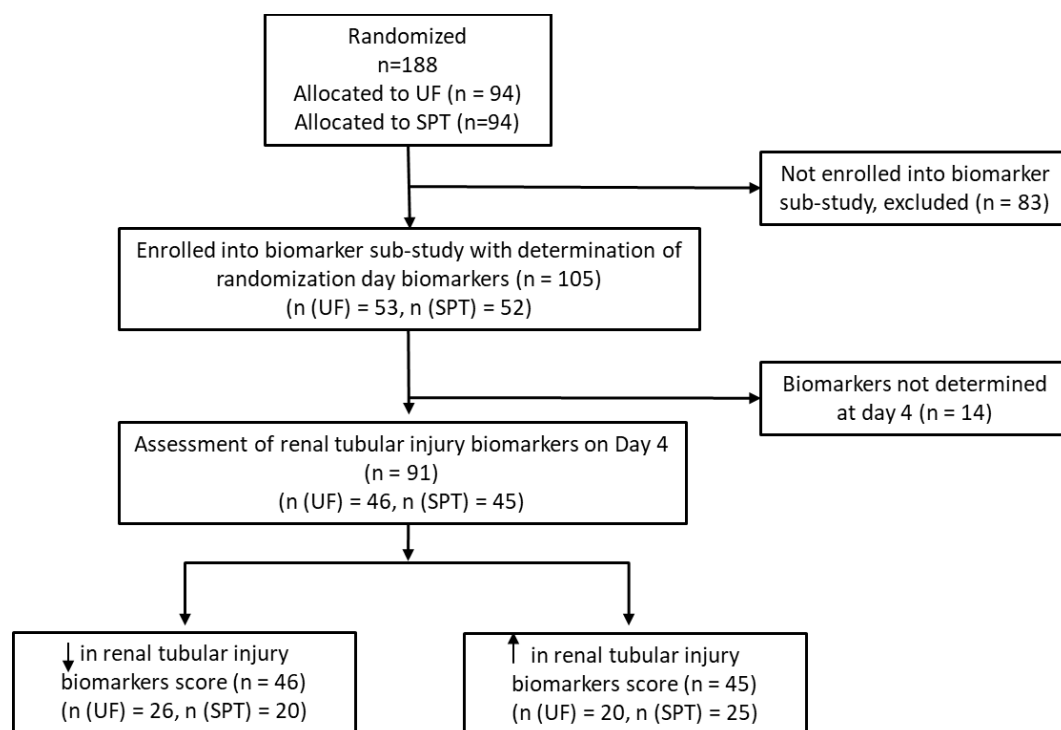

**Supplementary Figure 2:** Change in creatinine and renal tubular injury biomarker score from the day of randomization to day 4 according to treatment group.

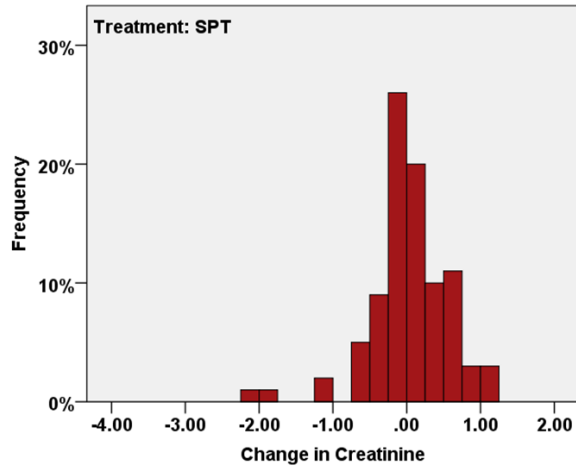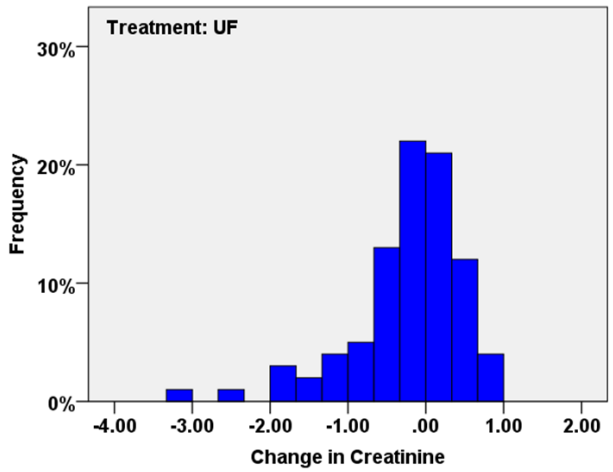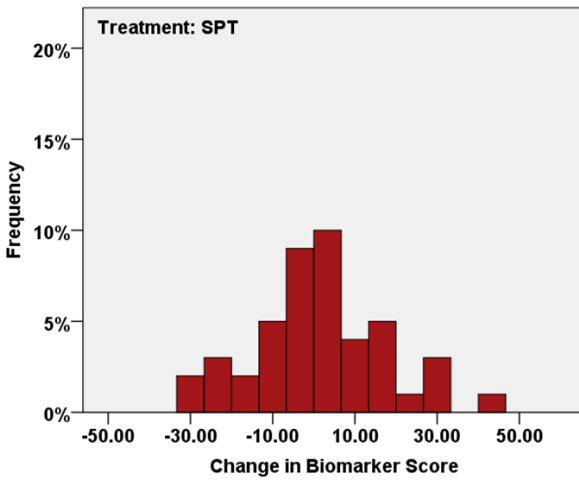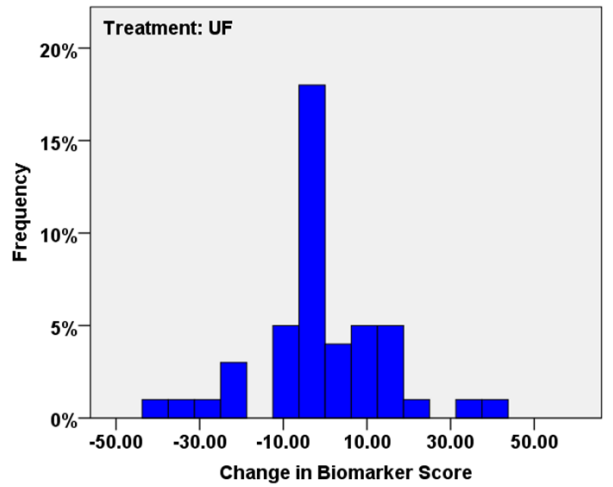

**Supplementary Figure 3:** Change in renal tubular injury biomarker analyzed by change in composite renal tubular injury score from randomization to day 4.

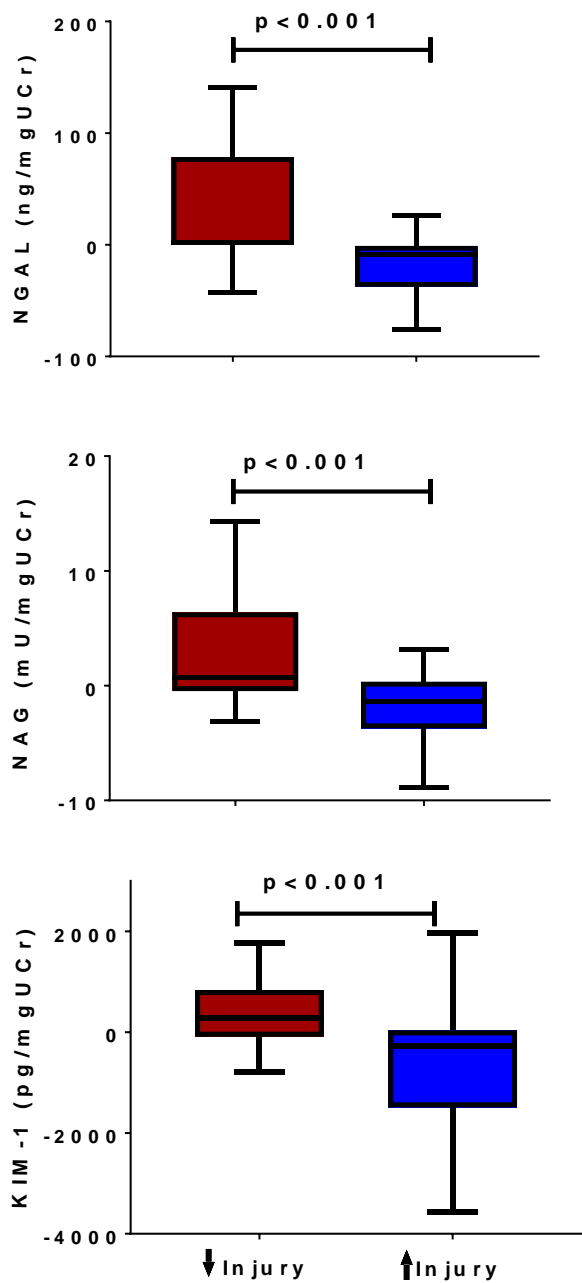

**Supplementary Table 1. Correlation of Day 4 CRP with Day 4 and  $\Delta$  Biomarkers**

|                               | <b>D4 NGAL</b>   | <b>D4 NAG</b>    | <b>D4 KIM-1</b>  | <b><math>\Delta</math>NGAL</b> | <b><math>\Delta</math>NAG</b> | <b><math>\Delta</math>KIM-1</b> |
|-------------------------------|------------------|------------------|------------------|--------------------------------|-------------------------------|---------------------------------|
| <b>D4 CRP</b>                 | 0.145<br>p=0.173 | 0.159<br>p=0.134 | 0.226<br>p=0.032 | 0.09<br>p=0.935                | 0.010<br>p=0.929              | -0.014<br>p=0.897               |
| <b><math>\Delta</math>CRP</b> | 0.058<br>p=0.589 | 0.092<br>p=0.393 | 0.230<br>p=0.030 | -0.064<br>p=0.559              | 0.088<br>p=0.417              | -0.203<br>p=0.060               |

**Supplementary Table 2. Longitudinal change in creatinine across the CARRESS-HF trial study periods, examined using mixed models.**

|                          | Increased Injury | Decreased Injury | <i>P</i> |
|--------------------------|------------------|------------------|----------|
| Pre-Enrollment WRF       | 0.2 ± 0.2        | 0.2 ± 0.2        | 0.83     |
| Intensive Volume Removal | 0.2 ± 0.1        | -0.1 ± 0.1       | 0.10     |
| Renal Recovery Period    | -0.4 ± 0.1       | 0.1 ± 0.1        | <0.001   |
| Overall                  | 0.0 ± 0.2        | 0.3 ± 0.2        | 0.02     |

\*Values are Delta Creatinine ± SEM
